# Supplementary material
Source: MDPI journal article supplement (https://www.mdpi.com/2073-4352/14/5/476)
Supplement: s1 [file s1]

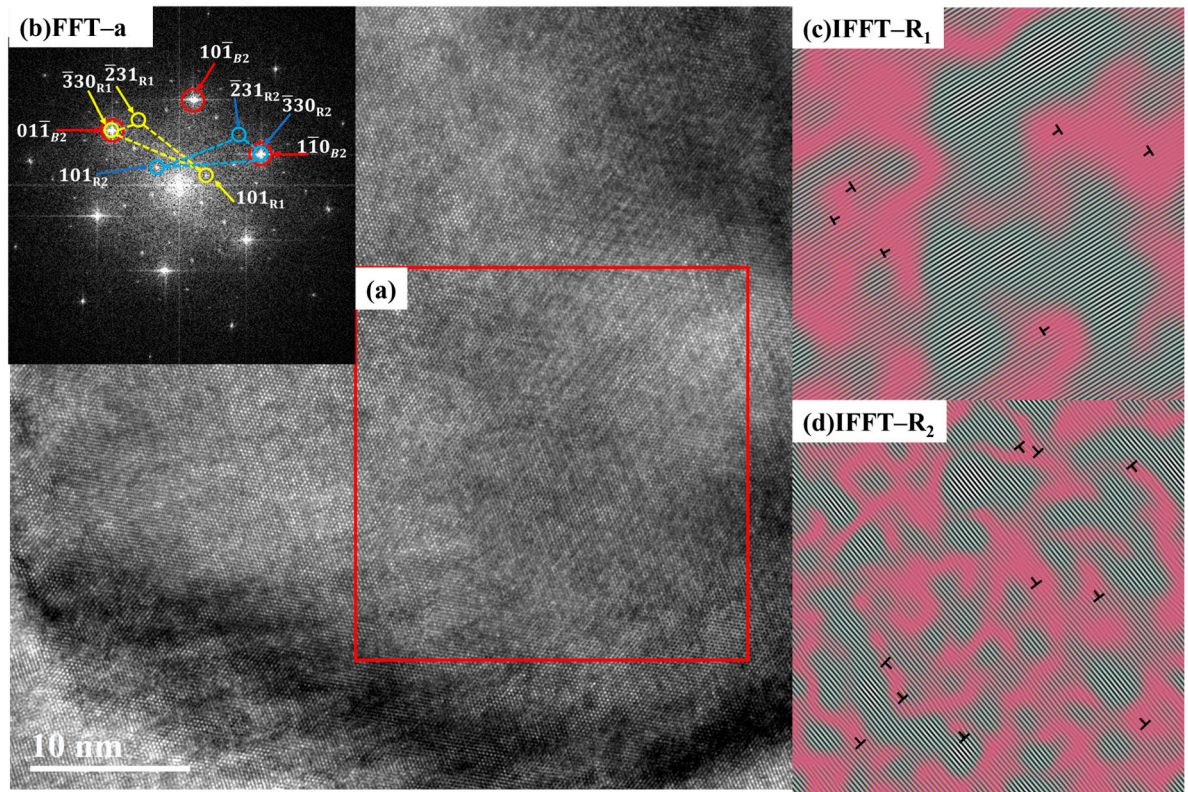

Figure S1: (a)Another HRTEM image, (b)the FFT result of red box in (a),(c)the IFFT result of  $R_1$  in(b) and (d) the IFFT result of  $R_2$  in (b).
